# Supplementary material for: Phenotypic diversity and provenance variation of Cupressus funebris: a case study in the Sichuan Basin, China
Source: PeerJ journal article supplement (doi:10.7717/peerj.18494), 2024-11-29

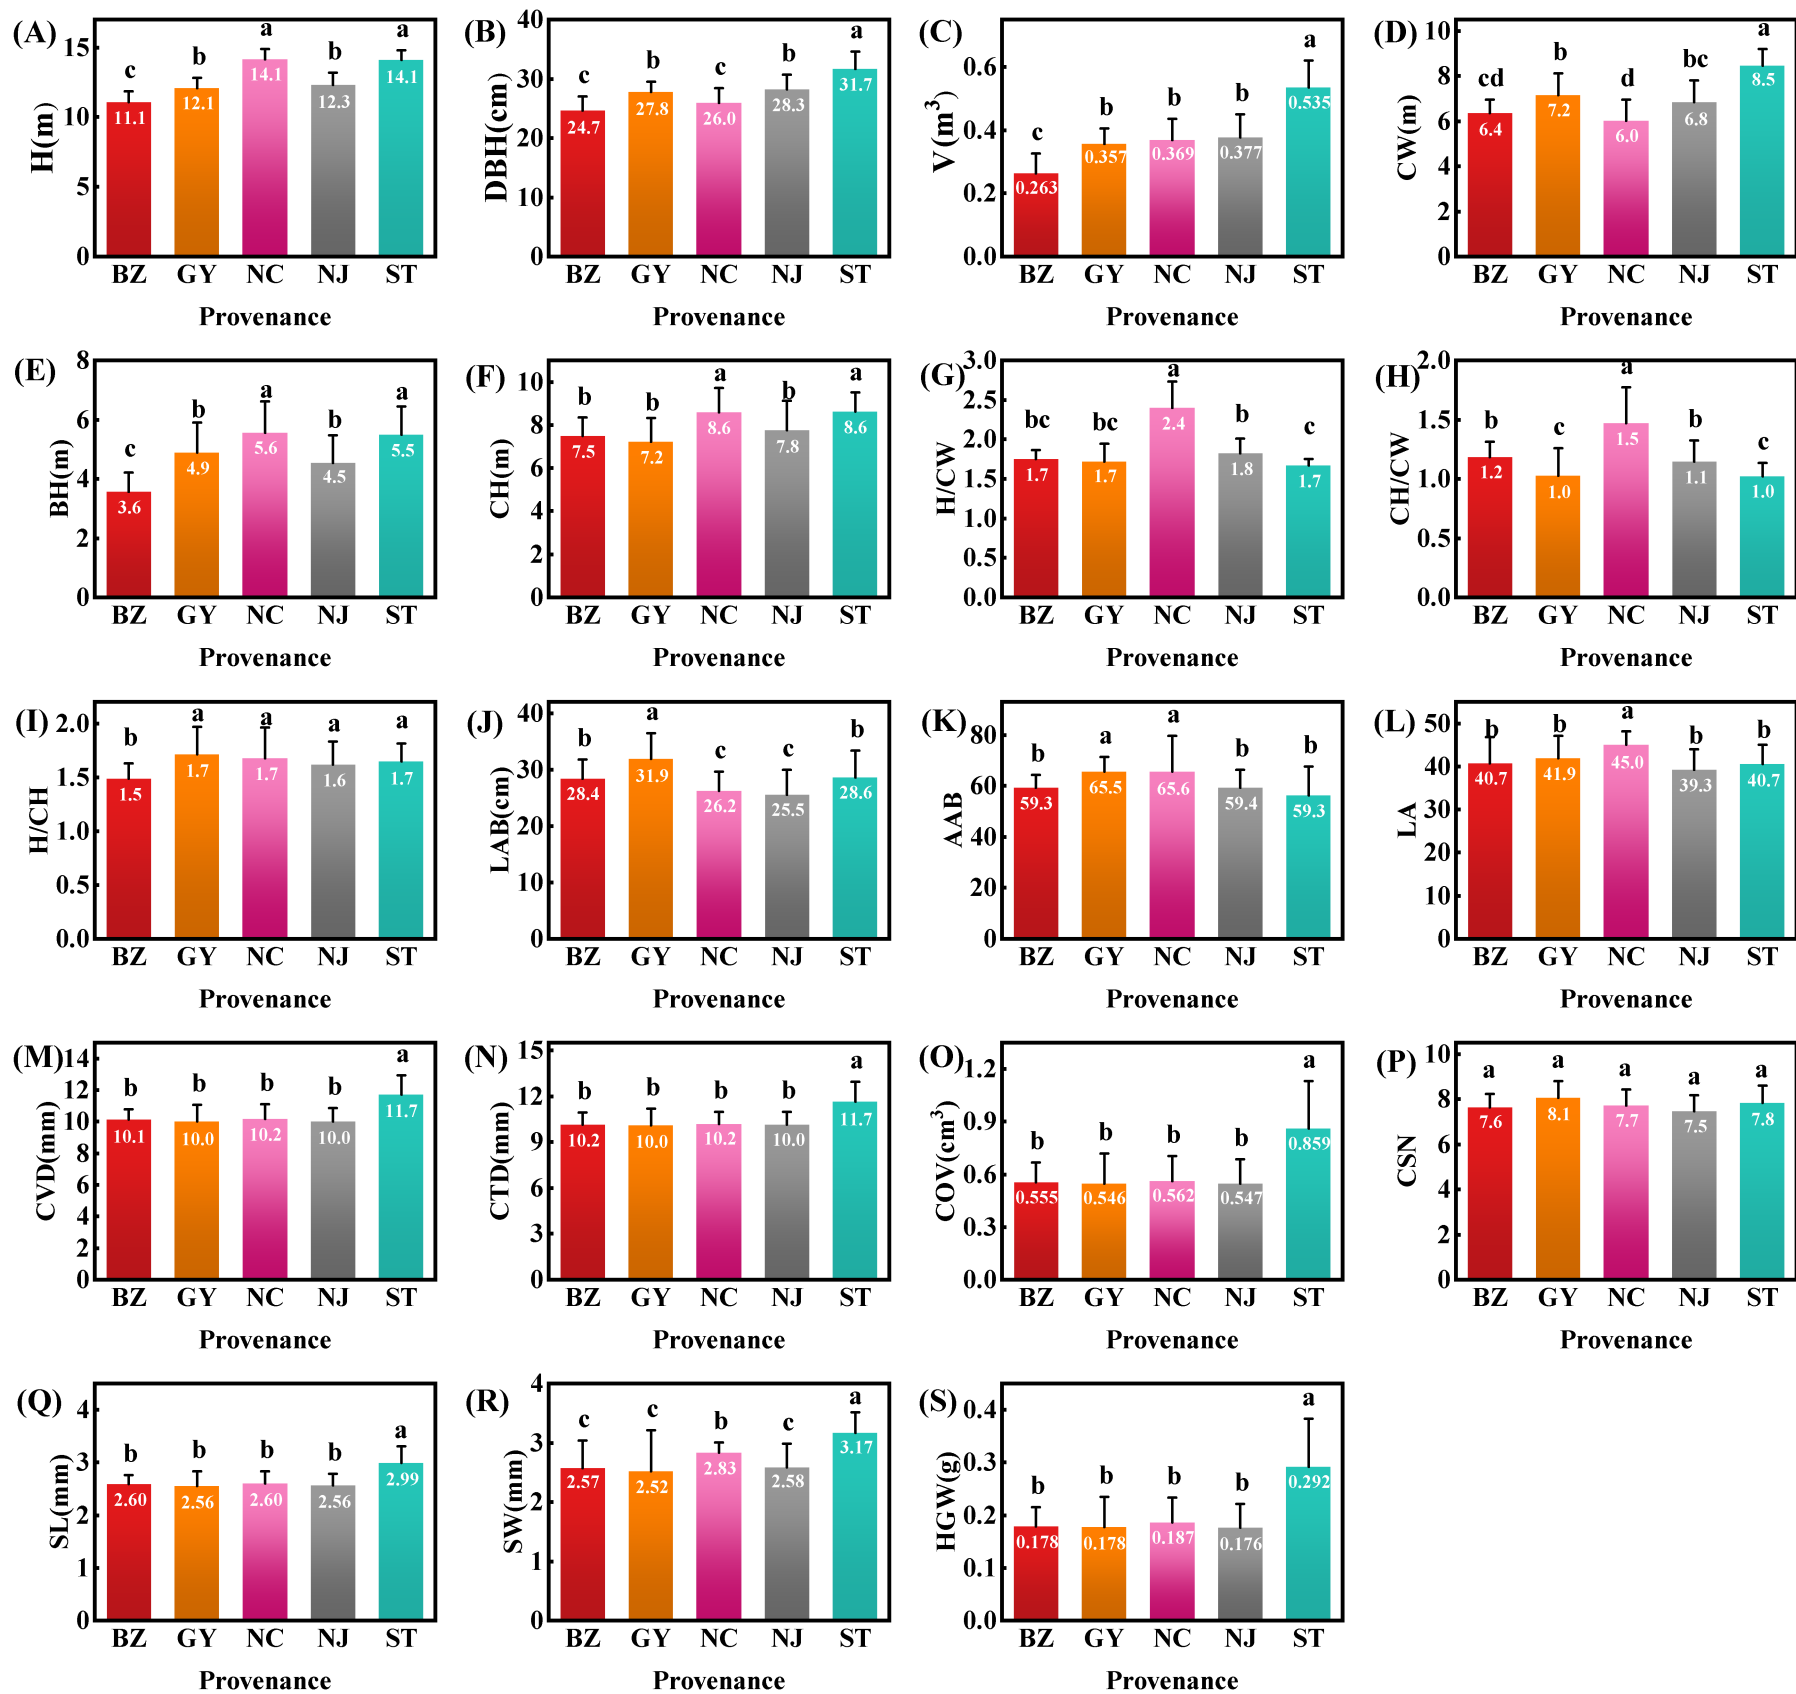

Supplement: Figure_S3.pdf [file Figure_S3.pdf]
