# Supplementary material for: Phenotypic diversity and provenance variation of Cupressus funebris: a case study in the Sichuan Basin, China
Source: PeerJ. 2024 Nov 29;12:e18494. doi: 10.7717/peerj.18494 (PMC11610466; doi:10.7717/peerj.18494)
Supplement: Supplemental Information 1 — BZ represents Bazhong City, GY represents Guangyuan City, NC represents Nanchong City, NJ represents Nanjiang County, and ST represents Santai County. ABA: annual branch angle; BH: branch height; CH: crown height; CH/CW: the ratio of crown height to crown width; COV: cone volume; CSN: cone scales number; CTD: cone transverse diameter; CVD: cone vertical diameter; CW: crown width; DBH: diameter at breast height; H: tree height; H/CW: the ratio of tree height to crown width; H/CH: the ratio of tree height to crown height; HGW: hundred-grain weight; LA: leaf angle; LAB: the length of annual branch; SL: seed length; SW: seed width; V: wood volume. [file peerj-12-18494-s001.xlsx]

## Sheet: Raw data
Provenances	Family	Code	H	DBH	V	CW	BH	CH	H/CW	CH/CW	H/CH	LAB	ABA	LA	CVD	CTD	COV	CSN	SL	SW	HGW
BZ	1	BZ1	12	28.7	0.376	7.4	4	8	1.6	1.1	1.5	30.4	51.5	38.3	10.9	11	0.686	8	2.78	2.83	0.222
BZ	1	BZ2	12	27.2	0.34	7	3.8	8.2	1.7	1.2	1.5	31.2	59.6	31.7	10.6	11	0.662	8	2.71	2.75	0.214
BZ	1	BZ3	11	25	0.265	6.4	3	8	1.7	1.2	1.4	26.4	61.6	37.2	10.3	9.8	0.527	9	2.62	2.19	0.171
BZ	2	BZ4	11	25.2	0.27	6.5	3.9	7.1	1.7	1.1	1.5	27	57.8	31.3	10.7	10.5	0.624	7	2.75	2.59	0.202
BZ	2	BZ5	12	27.9	0.357	7.2	3.9	8.1	1.7	1.1	1.5	30.7	58.5	37.8	11.3	10.6	0.69	8	2.89	2.86	0.223
BZ	2	BZ6	12	27.2	0.34	7	3.2	8.8	1.7	1.3	1.4	33.4	56.4	35.7	10.9	11.1	0.697	8	2.8	2.89	0.225
BZ	3	BZ7	10	22.7	0.201	5.8	2.5	7.5	1.7	1.3	1.3	28.5	62	38.3	11.6	12	0.858	8	2.97	3.56	0.277
BZ	3	BZ8	12	25.2	0.294	6.5	2.8	9.2	1.8	1.4	1.3	35	66.7	36.4	9.5	9.4	0.443	7	2.44	1.84	0.143
BZ	3	BZ9	11	25	0.265	6.4	3.7	7.3	1.7	1.1	1.5	27.7	64.9	45.2	9.6	9.2	0.436	7	2.46	1.81	0.141
BZ	4	BZ10	12	24.4	0.278	6.3	4	8	1.9	1.3	1.5	31.4	54.6	50	9.9	10.2	0.534	7	2.53	2.22	0.173
BZ	4	BZ11	12	24.1	0.269	6.2	4	8	1.9	1.3	1.5	30.4	65	52.3	9.3	9.5	0.436	7	2.38	1.81	0.141
BZ	4	BZ12	12	27.2	0.34	7	3.5	8.5	1.7	1.2	1.4	32.3	65.2	55.7	9.6	9.4	0.448	7	2.45	1.86	0.145
BZ	5	BZ13	11	21	0.19	5.4	4.1	6.9	2	1.3	1.6	26.2	55.2	46.5	9.5	9.5	0.449	8	2.43	1.86	0.145
BZ	5	BZ14	11	23.3	0.232	6	3.8	7.2	1.8	1.2	1.5	27.4	54.7	46.8	9.8	9.1	0.442	8	2.52	1.83	0.143
BZ	5	BZ15	11	26.4	0.294	6.8	3.2	7.8	1.6	1.1	1.4	29.6	60.7	46.3	9.1	9.5	0.422	8	2.34	1.75	0.137
BZ	6	BZ16	10	21.3	0.179	5.5	3	7	1.8	1.3	1.4	26.6	48.4	38.1	10.5	10.8	0.631	8	2.7	2.62	0.204
BZ	6	BZ17	10	23.3	0.211	6	3.6	6.4	1.7	1.1	1.6	24.3	51.5	37.9	10.5	10.8	0.623	8	2.67	2.9	0.202
BZ	6	BZ18	10	21	0.173	5.4	2.3	7.7	1.9	1.4	1.3	29.4	69.2	37.2	10.4	10.6	0.609	8	2.67	2.6	0.197
BZ	7	BZ19	11	25	0.265	6.4	3.2	7.8	1.7	1.2	1.4	29.5	56.9	32.2	9.5	9	0.408	8	2.42	2.57	0.132
BZ	7	BZ20	12	27.9	0.357	7.2	3.8	8.2	1.7	1.1	1.5	31.2	58.5	37.6	9.3	9.2	0.414	7	2.39	2.55	0.134
BZ	7	BZ21	11	21	0.19	5.4	3.3	7.7	2	1.4	1.4	29.3	69.8	38.1	9.8	9.1	0.436	7	2.5	2.79	0.141
BZ	8	BZ22	12	27.5	0.345	7.1	3.5	8.4	1.7	1.2	1.4	31.9	62.8	30.4	11.1	11.4	0.747	6	2.85	2.9	0.241
BZ	8	BZ23	11	24.4	0.255	6.3	3.1	7.9	1.7	1.3	1.4	30	56	43.6	10.1	10.8	0.599	8	2.59	3.03	0.194
BZ	8	BZ24	10	22.7	0.201	5.8	3.8	6.2	1.7	1.1	1.6	23.6	55.5	37.4	10.2	10.3	0.559	8	2.61	2.87	0.181
BZ	9	BZ25	11	23.3	0.232	6	3.8	7.2	1.8	1.2	1.5	27.4	59.6	37.2	10.6	10	0.574	8	2.72	2.74	0.186
BZ	9	BZ26	11	24.1	0.247	6.2	5	6	1.8	1	1.8	22.8	66.4	38.4	10.2	10.9	0.616	7	2.62	2.67	0.199
BZ	9	BZ27	11	27.2	0.31	7	3	8	1.6	1.1	1.4	30	56.5	37.3	10.2	10.8	0.601	8	2.6	2.67	0.194
BZ	10	BZ28	12	28.7	0.376	7.4	4	8	1.6	1.1	1.5	31.4	55.6	44.5	10.4	10.1	0.558	8	2.65	2.85	0.181
BZ	10	BZ29	10	21.3	0.179	5.5	2.4	7.6	1.8	1.4	1.3	28.9	57.9	42.8	10.7	10.4	0.614	8	2.73	3.06	0.198
BZ	10	BZ30	10	22.1	0.192	5.7	3.1	6.9	1.8	1.2	1.4	26.4	57.7	45.8	10.1	10.8	0.599	8	2.59	2.55	0.194
BZ	11	BZ31	10	22.9	0.205	5.9	4	6	1.7	1	1.7	22.8	58.8	47.4	9.9	9.1	0.449	7	2.52	3.02	0.145
BZ	11	BZ32	10	24.4	0.231	6.3	4.1	5.9	1.6	0.9	1.7	22.4	58.2	39.3	9.5	9.7	0.46	8	2.43	2.94	0.149
BZ	11	BZ33	11	25	0.265	6.4	5.3	5.7	1.7	0.9	1.9	21.7	63.8	47.5	9.1	9.8	0.437	7	2.32	2.96	0.141
GY	12	GY1	11	28.2	0.332	6.7	5.1	5.9	1.6	0.9	1.9	25.3	65.2	36.7	9.8	10.2	0.523	7	2.5	2.6	0.169
GY	12	GY2	11	29.5	0.363	7.1	4.6	6.4	1.5	0.9	1.7	28.5	60.9	42.5	10.3	10.9	0.622	8	2.63	2.71	0.201
GY	12	GY3	12	30.4	0.418	6.5	3.9	8.1	1.8	1.2	1.5	36.1	67.7	33.7	10	9.2	0.461	8	2.54	2.61	0.149
GY	13	GY4	12	27.3	0.342	8.5	4.8	7.2	1.4	0.8	1.7	32.1	63.5	35.2	10.6	10.7	0.627	8	2.71	2.64	0.203
GY	13	GY5	13	26.2	0.344	7.9	5.1	7.9	1.6	1	1.6	35.2	52.5	40.1	10.7	10.7	0.64	8	2.73	2.8	0.207
GY	13	GY6	13	28.2	0.393	8.4	5.5	7.5	1.5	0.9	1.7	33.5	54	31	10.3	10.4	0.579	8	2.63	2.81	0.187
GY	14	GY7	12	25.6	0.303	4.6	3.6	8.5	2.6	1.8	1.4	37.7	72.8	50.2	10	9.4	0.477	7	2.55	2.46	0.154
GY	14	GY8	12	24.3	0.274	5.7	3.6	8.5	2.1	1.5	1.4	35.8	74.4	49.1	8.8	8.8	0.354	7	2.24	2.47	0.114
GY	14	GY9	12	27.9	0.356	6.6	4.5	7.5	1.8	1.1	1.6	33.5	76.3	50.1	8.2	8.4	0.3	7	2.11	1.24	0.097
GY	15	GY10	12	28.1	0.361	7.3	3.4	8.6	1.6	1.2	1.4	38.4	57.9	35.2	8.2	8.6	0.309	7	2.09	1.28	0.1
GY	15	GY11	11	28.5	0.34	6.7	3	8	1.6	1.2	1.4	35.7	75.6	34.5	8.3	8.5	0.308	7	2.11	1.28	0.1
GY	15	GY12	13	28.7	0.406	7.5	5.1	7.9	1.7	1.1	1.6	35.2	62.9	35.6	8	8.3	0.283	7	2.05	1.18	0.092
GY	16	GY13	12	27.3	0.342	6.3	5.3	6.8	1.9	1.1	1.8	30.2	65.7	37.3	9.2	9.2	0.403	8	2.34	1.67	0.13
GY	16	GY14	12	31	0.434	7.3	7.4	4.7	1.6	0.6	2.6	20.7	63.2	39.7	10.5	10.4	0.594	9	2.67	2.46	0.192
GY	16	GY15	12	26.1	0.314	6.8	6.1	6	1.8	0.9	2	26.6	72.2	43.2	9.9	9.9	0.502	9	2.52	2.09	0.162
GY	17	GY16	13	27.6	0.378	7.6	6.1	6.9	1.7	0.9	1.9	30.8	60.5	47.3	11.9	12.3	0.925	8	3.04	3.84	0.299
GY	17	GY17	13	27.1	0.365	8.2	5	8	1.6	1	1.6	35.7	65.5	47.1	11.9	12.2	0.913	8	3.04	3.79	0.295
GY	17	GY18	13	28.7	0.407	8.1	5.4	7.7	1.6	0.9	1.7	34.1	59.1	46.6	12	12.4	0.948	8	3.06	3.93	0.307
GY	18	GY19	12	26.3	0.319	8.3	5.5	6.5	1.4	0.8	1.8	29	72.6	39.9	10.7	10.4	0.614	9	2.74	2.55	0.198
GY	18	GY20	13	27.6	0.378	8	4.9	8.1	1.6	1	1.6	36.1	63.8	42.2	10	10	0.516	8	2.54	2.14	0.167
GY	18	GY21	12	32.8	0.483	8.4	4.8	7.2	1.4	0.9	1.7	32.1	64.2	41.8	10.7	10.4	0.614	9	2.74	2.43	0.198
GY	19	GY22	12	27.4	0.344	6.8	5.7	6.3	1.8	0.9	1.9	28.1	65.2	43.4	11	11.2	0.714	9	2.8	2.84	0.231
GY	19	GY23	11	27	0.307	6.1	5.6	5.4	1.8	0.9	2	24.1	64.1	43.6	10.1	10.2	0.546	9	2.57	2.82	0.176
GY	19	GY24	11	26.7	0.3	6.7	3.5	7.5	1.6	1.1	1.5	33.5	66.8	44.1	10.3	10.4	0.583	9	2.63	2.48	0.188
GY	20	GY25	13	29.7	0.434	7.9	6.5	6.5	1.6	0.8	2	29	67.6	47.8	10.6	10.5	0.611	9	2.71	2.85	0.198
GY	20	GY26	12	27.7	0.351	6.7	5.7	6.3	1.8	0.9	1.9	28.2	67.7	48	10.6	10.5	0.61	9	2.7	2.79	0.197
GY	20	GY27	11	26.3	0.292	5.8	5.3	5.8	1.9	1	1.9	25.6	70.7	45.1	10.5	10.4	0.593	9	2.68	2.69	0.192
GY	21	GY28	12	26.9	0.332	7.8	4.6	7.4	1.5	0.9	1.6	33	61	41.4	9	9.1	0.392	8	2.31	2.78	0.127
GY	21	GY29	12	27.5	0.346	6.5	3.4	8.6	1.8	1.3	1.4	38.4	67.7	41.1	9.3	9.7	0.449	8	2.38	2.75	0.145
GY	21	GY30	13	28.1	0.391	8	3.7	9.3	1.6	1.2	1.4	35.4	63.8	42.3	9.4	9.1	0.411	7	2.39	2.64	0.133
NC	22	NC1	14	30.7	0.495	7.9	4.8	9.3	1.8	1.2	1.5	28.2	64.1	44.5	9.1	9.4	0.416	8	2.34	2.63	0.139
NC	22	NC2	14	27.2	0.395	7	5.9	8.2	2	1.2	1.7	24.9	64.4	43.8	9.3	9.4	0.425	8	2.37	2.63	0.142
NC	22	NC3	14	27.9	0.416	7.2	5.1	9	1.9	1.2	1.6	27.4	63.4	43.6	9.2	9.4	0.42	8	2.35	2.69	0.14
NC	23	NC4	15	23.3	0.316	6	5.2	9.8	2.5	1.6	1.5	29.9	61.1	40.7	9.5	9.8	0.472	7	2.44	2.66	0.158
NC	23	NC5	15	23.3	0.316	6	5.3	9.7	2.5	1.6	1.5	29.6	51.2	44.8	9.8	9.3	0.46	7	2.51	2.67	0.154
NC	23	NC6	15	24.1	0.336	6.2	4.7	10.3	2.4	1.7	1.5	31.5	63.9	40.4	8.4	8.6	0.323	7	2.15	2.67	0.108
NC	24	NC7	13	25	0.314	4.9	4.6	8.4	2.7	1.7	1.5	25.6	74.6	43.7	9.6	9.5	0.457	7	2.46	2.68	0.153
NC	24	NC8	14	27	0.39	5.6	5.2	8.8	2.5	1.6	1.6	26.8	77.6	43.8	9.6	9.6	0.464	7	2.46	2.65	0.155
NC	24	NC9	15	28.2	0.454	5.8	5.7	9.4	2.6	1.6	1.6	28.5	76.6	43.6	9.6	9.5	0.457	7	2.46	2.6	0.153
NC	25	NC10	13	23	0.268	5.5	4.7	8.4	2.4	1.5	1.6	25.5	95.4	46.2	9.9	10	0.517	8	2.53	2.87	0.173
NC	25	NC11	13	25	0.314	4.9	4.5	8.5	2.7	1.7	1.5	25.9	90.2	46.1	10.1	9.9	0.523	8	2.59	2.92	0.175
NC	25	NC12	13	25	0.314	5.8	6.4	6.6	2.2	1.1	2	20.1	90.8	47.4	10.2	10	0.536	8	2.6	3.01	0.179
NC	26	NC13	14	27.5	0.404	5.4	5	9.1	2.6	1.7	1.5	27.6	67.7	40.4	10.9	11.4	0.722	9	2.78	3.02	0.242
NC	26	NC14	14	26	0.363	4.8	6.2	7.9	2.9	1.6	1.8	23.9	56.5	48	10.1	10.5	0.57	8	2.57	3.01	0.191
NC	26	NC15	14	27	0.39	5.6	5.6	8.4	2.5	1.5	1.7	25.8	55.4	48.3	11.1	11.1	0.716	9	2.83	2.98	0.24
NC	27	NC16	15	27.5	0.434	7.1	7	8	2.1	1.1	1.9	24.4	52.2	51	11.8	11.2	0.791	9	3.01	2.98	0.265
NC	27	NC17	15	27.2	0.423	7	6.5	8.5	2.1	1.2	1.8	25.9	53.1	49.7	11.8	11.2	0.791	9	3.01	2.99	0.265
NC	27	NC18	14	28.7	0.441	7.4	9	5.1	1.9	0.7	2.8	15.6	58	49.7	11.3	10.7	0.692	9	2.88	2.96	0.232
NC	28	NC19	14	28.1	0.421	4.6	4.5	9.5	3	2.1	1.5	29	68	42.5	10.4	10.9	0.632	7	2.67	2.97	0.212
NC	28	NC20	15	23.3	0.316	6	5.9	9.1	2.5	1.5	1.6	27.8	44.7	44.2	11.3	11.5	0.769	7	2.88	2.98	0.258
NC	28	NC21	14	21	0.242	5.4	5.3	8.8	2.6	1.6	1.6	26.8	49.4	43.3	10.8	10.6	0.64	7	2.76	2.97	0.214
NJ	29	NJ1	12	29.7	0.402	7.1	4.8	7.2	1.7	1	1.7	24.8	59.2	41.4	8.3	8.8	0.329	6	2.14	2.56	0.107
NJ	29	NJ2	12	30.6	0.424	7.3	5.2	6.8	1.6	0.9	1.8	23.8	55.2	40.6	9.5	9.4	0.44	8	2.43	2.74	0.142
NJ	29	NJ3	11	28.6	0.342	6.5	5.5	5.5	1.7	0.8	2	26	59.5	42.4	8.9	9.3	0.391	6	2.27	2.51	0.126
NJ	30	NJ4	12	33.8	0.511	7	5	7	1.7	1	1.7	22	59.6	36.7	11.2	10.6	0.681	8	2.87	2.35	0.22
NJ	30	NJ5	11	29.9	0.372	6.3	5.6	5.4	1.7	0.9	2	22	60.4	40	9.1	9.2	0.404	8	2.34	2.62	0.131
NJ	30	NJ6	11	31.8	0.418	6.5	3.9	7.1	1.7	1.1	1.5	21.8	65.3	41.8	11	11.9	0.793	6	2.82	2.73	0.256
NJ	31	NJ7	12	28.6	0.373	7.5	4.6	7.4	1.6	1	1.6	25	61.4	42	10	10.2	0.538	9	2.57	2.52	0.174
NJ	31	NJ8	12	29.9	0.405	7.6	4.7	7.3	1.6	1	1.6	23.9	57.6	41.7	10.3	10.7	0.608	7	2.64	2.8	0.197
NJ	31	NJ9	12	27.8	0.354	7	4.4	7.6	1.7	1.1	1.6	23.9	59.4	40.9	10.2	10.2	0.553	7	2.61	2.63	0.179
NJ	32	NJ10	11	26.1	0.288	6	5	6	1.8	1	1.8	23.3	62.6	39.7	10	10.8	0.594	8	2.57	2.67	0.192
NJ	32	NJ11	13	28.4	0.399	8	5.2	7.8	1.6	1	1.7	24.3	59.3	40.7	9.2	10	0.461	7	2.36	1.91	0.149
NJ	32	NJ12	12	27.4	0.343	7.6	6.2	5.8	1.6	0.8	2.1	21.3	60.8	40.7	9.5	9.2	0.431	8	2.43	1.79	0.139
NJ	33	NJ13	12	25.9	0.309	7.3	4.4	7.6	1.6	1	1.6	24.7	66	37.2	9.9	9.6	0.486	8	2.52	2.02	0.157
NJ	33	NJ14	13	27.9	0.385	8.1	5.8	7.2	1.6	0.9	1.8	27.1	55.8	41.6	9.8	9.7	0.487	7	2.5	2.02	0.157
NJ	33	NJ15	13	27.4	0.373	7.8	4.5	8.5	1.7	1.1	1.5	29.6	62.3	36.5	8.5	8.6	0.324	8	2.16	1.34	0.105
NJ	34	NJ16	11	27.8	0.324	5.6	4.3	6.7	2	1.2	1.6	25.4	49.1	34.5	9	9.5	0.413	8	2.29	1.71	0.134
NJ	34	NJ17	12	25.6	0.304	6.7	3.8	8.2	1.8	1.2	1.5	25.4	58.7	44.6	10.7	10.5	0.62	8	2.73	2.57	0.2
NJ	34	NJ18	11	22.5	0.218	5.5	2.4	8.6	2	1.6	1.3	26.8	47	47	10.3	10.4	0.576	8	2.63	2.39	0.186
NJ	35	NJ19	11	27.6	0.32	5.2	5.6	5.4	2.1	1	2	27.1	64.6	34	9.3	10	0.47	7	2.38	1.95	0.152
NJ	35	NJ20	11	30.4	0.384	6.1	5.3	5.7	1.8	0.9	1.9	27.6	65.2	30.7	9	9	0.382	6	2.3	1.59	0.124
NJ	35	NJ21	11	27.7	0.322	6.3	5.2	5.8	1.7	0.9	1.9	28.1	56.6	31.2	9.9	10.4	0.545	8	2.53	2.26	0.176
NJ	36	NJ22	12	29.2	0.389	6.1	3.5	8.5	2	1.4	1.4	23.2	61.5	38.4	11.3	11.4	0.761	8	2.89	3.16	0.246
NJ	36	NJ23	12	29.9	0.406	6.1	3.3	8.7	2	1.4	1.4	23.7	67.6	41.2	12.5	11.5	0.913	8	3.21	3.79	0.295
NJ	36	NJ24	12	26.2	0.316	5.9	3.9	8.1	2	1.4	1.5	24.7	58.2	43.3	11.1	11.7	0.78	8	2.85	3.24	0.252
NJ	37	NJ25	13	27	0.363	7.7	4.6	8.4	1.7	1.1	1.5	23.7	56.6	39.2	9.9	10.2	0.536	7	2.54	2.22	0.173
NJ	37	NJ26	12	25.5	0.3	6.8	4.2	7.8	1.8	1.1	1.5	24.7	66.3	33.2	10.6	10.1	0.579	9	2.7	2.52	0.187
NJ	37	NJ27	13	26	0.336	7.8	4.5	8.5	1.7	1.1	1.5	23	59.6	35	10.4	10.3	0.58	8	2.67	3	0.188
NJ	38	NJ28	13	24.1	0.293	8	3.5	9.5	1.6	1.2	1.4	23.6	53.5	33.6	11.8	12.9	0.979	8	3.01	2.79	0.317
NJ	38	NJ29	13	23.8	0.285	8.6	3.4	9.6	1.5	1.1	1.4	23.4	55.9	36.7	9.2	10.2	0.479	8	2.36	2.4	0.155
NJ	38	NJ30	13	26.1	0.339	8.5	3.2	9.8	1.5	1.2	1.3	23.7	56.3	31.6	11.2	11.3	0.743	8	2.87	3.11	0.24
NJ	39	NJ31	12	30.3	0.416	6.1	3.5	8.5	2	1.4	1.4	26.7	52.8	41.8	10.4	10.2	0.575	8	2.67	2.34	0.186
NJ	39	NJ32	13	27.4	0.372	6.7	4.9	8.1	1.9	1.2	1.6	20.7	53.5	40.2	10	10.6	0.567	7	2.54	2.88	0.183
NJ	39	NJ33	13	28	0.388	7.5	6.2	6.8	1.7	0.9	1.9	28.1	53	42.9	10.4	10.8	0.625	7	2.66	2.85	0.202
NJ	40	NJ34	12	26.7	0.328	5.8	5.3	6.7	2.1	1.2	1.8	31.2	65	37.2	10.2	10.4	0.568	8	2.61	2.55	0.184
NJ	40	NJ35	13	27.9	0.385	6.7	3.9	9.1	1.9	1.4	1.4	33.9	53.4	38	12.1	11.4	0.849	9	3.09	3.17	0.275
NJ	40	NJ36	14	32.8	0.563	8.6	3.9	10.1	1.6	1.2	1.4	32.2	62.8	38.6	9.3	9.7	0.447	7	2.37	2.52	0.145
NJ	41	NJ37	14	30.4	0.474	8.2	4.3	9.3	1.7	1.1	1.5	24	67.6	50.8	11.4	11.5	0.777	7	2.91	2.73	0.251
NJ	41	NJ38	13	23.1	0.264	7	4.6	8.1	1.8	1.2	1.6	20.4	54.1	37.1	9.6	10.8	0.559	6	2.47	2.87	0.181
NJ	41	NJ39	13	27.9	0.385	7.5	3.2	9.8	1.7	1.3	1.3	20.9	55.7	41.9	9.6	10.3	0.51	7	2.45	2.31	0.165
NJ	42	NJ40	12	27.8	0.354	6.1	4.6	7.4	2	1.2	1.6	33.8	57	41	11	11.1	0.707	8	2.81	2.84	0.229
NJ	42	NJ41	12	25.6	0.304	5.1	4.9	7.1	2.4	1.4	1.7	26.2	62	27.1	9.9	9.6	0.488	8	2.54	2.17	0.158
NJ	42	NJ42	14	31.2	0.512	8.3	2.6	11.4	1.7	1.4	1.2	34.9	65.8	35.3	9.5	9.6	0.46	9	2.44	2.78	0.149
NJ	43	NJ43	15	33.6	0.631	8.9	6	9	1.7	1	1.7	22.9	68.5	35	8.4	8.5	0.315	6	2.16	2.11	0.102
NJ	43	NJ44	14	28.9	0.443	8.5	3.2	10.8	1.6	1.3	1.3	21.2	65	37.6	10.7	10.9	0.657	8	2.74	2.37	0.212
NJ	43	NJ45	11	29.1	0.353	5.5	3.5	7.5	2	1.4	1.5	25.8	62.7	35.3	9.5	9.8	0.473	7	2.44	2.05	0.153
NJ	44	NJ46	13	28.4	0.399	8.7	4.2	8.8	1.5	1	1.5	26	54.2	33.8	12.1	11.9	0.895	7	3.09	2.87	0.29
NJ	44	NJ47	11	26.6	0.298	5.6	3.8	7.2	2	1.3	1.5	22.2	62.7	43	10.4	10	0.557	8	2.66	2.58	0.18
NJ	44	NJ48	11	27.9	0.326	6.2	3.7	7.3	1.8	1.2	1.5	17.9	59.2	40.7	9.7	9.7	0.475	8	2.48	2.28	0.153
NJ	45	NJ49	12	26.8	0.329	6.4	5.3	6.7	1.9	1	1.8	25.7	58	33.7	10.6	10.7	0.632	7	2.7	2.42	0.204
NJ	45	NJ50	12	30.5	0.42	6.1	5.7	6.3	2	1	1.9	23.9	57.1	36.5	9.6	9.4	0.453	7	2.46	2.82	0.146
NJ	45	NJ51	12	29.4	0.393	6.7	5.1	6.9	1.8	1	1.7	18.8	63	40	11.2	11.4	0.756	7	2.87	2.76	0.245
NJ	46	NJ52	13	27.9	0.385	7.5	3.7	9.3	1.7	1.2	1.4	25.5	43.5	38.8	10.9	10.1	0.604	9	2.79	3	0.195
NJ	46	NJ53	12	26.5	0.323	6.4	5.2	6.8	1.9	1.1	1.8	26.8	39.1	30.4	10.1	10.6	0.582	7	2.58	2.5	0.188
NJ	46	NJ54	12	33	0.487	5.1	5.2	6.8	2.4	1.3	1.8	25.8	45.1	45.5	10.5	10.7	0.627	8	2.69	2.4	0.203
NJ	47	NJ55	13	31.5	0.485	7.9	4.4	8.6	1.6	1.1	1.5	23	56.4	48.2	10.2	10	0.538	8	2.61	2.82	0.174
NJ	47	NJ56	12	29.2	0.389	6.1	4.2	7.8	2	1.3	1.5	21.3	47.7	41.5	9.5	9.5	0.448	7	2.43	2.6	0.145
NJ	47	NJ57	12	27.1	0.338	6	5.2	6.8	2	1.1	1.8	25.9	52.1	41	9.1	9.1	0.39	7	2.32	2.82	0.126
NJ	48	NJ58	12	25.3	0.297	6.3	5.2	6.8	1.9	1.1	1.8	23.5	70.4	38.3	9.1	9	0.385	7	2.32	2.79	0.125
NJ	48	NJ59	13	27.4	0.372	6.7	5	8	1.9	1.2	1.6	24.3	72.9	54	9.7	9.3	0.448	8	2.49	2.83	0.145
NJ	48	NJ60	13	24.4	0.3	7.5	5.2	7.8	1.7	1	1.7	21.2	67.5	48.2	9.1	9.4	0.416	8	2.33	2.78	0.134
NJ	49	NJ61	13	27	0.362	7.8	6.2	6.8	1.7	0.9	1.9	23.3	57.7	40.7	10.4	10.3	0.576	7	2.65	2.83	0.186
NJ	49	NJ62	13	31.4	0.481	7.4	5.8	7.2	1.8	1	1.8	26.4	57.8	43.2	9.7	10	0.495	8	2.47	3.09	0.16
NJ	49	NJ63	13	26.2	0.342	7	3.3	9.7	1.9	1.4	1.3	20	61.1	44.5	9	9.8	0.435	8	2.31	3.06	0.141
NJ	50	NJ64	14	29.8	0.471	8.5	4.2	9.8	1.6	1.2	1.4	26.1	58.8	36.8	10.1	10.5	0.569	6	2.59	2.66	0.184
NJ	50	NJ65	13	33.3	0.538	6.4	3.6	9.4	2	1.5	1.4	24.2	63.7	37.7	9.1	9.8	0.447	8	2.34	2.87	0.145
NJ	50	NJ66	13	32.9	0.525	6.4	3	10	2	1.6	1.3	23.7	62.8	36.3	9.1	9.7	0.436	8	2.34	3.01	0.141
NJ	51	NJ67	12	27.9	0.355	5.2	5.3	6.7	2.3	1.3	1.8	35.5	57.2	34.1	10.1	10.9	0.604	8	2.58	2.74	0.195
NJ	51	NJ68	12	30.3	0.415	6.1	4.8	7.2	2	1.2	1.7	24.5	56.3	45.8	10.1	9.8	0.513	7	2.59	2.77	0.166
NJ	51	NJ69	12	25.8	0.306	6	4.8	7.2	2	1.2	1.7	29.3	56.1	35	10.1	10.4	0.564	8	2.59	2.5	0.183
NJ	52	NJ70	12	29.9	0.406	6.3	6.2	5.8	1.9	0.9	2.1	25.3	71.5	39.4	10.4	10.1	0.56	8	2.66	2.39	0.181
NJ	52	NJ71	12	29.6	0.398	6.4	5.1	6.9	1.9	1.1	1.7	31.3	74.4	44.7	9.9	10.1	0.531	7	2.54	2.38	0.172
NJ	52	NJ72	13	25.7	0.33	6.7	2	11	1.9	1.6	1.2	26	75.2	47	8.8	9.2	0.383	6	2.26	2.31	0.124
NJ	53	NJ73	13	27.6	0.377	7.4	5.3	7.7	1.8	1	1.7	22.8	64.4	40.8	10.5	10	0.563	8	2.68	3.08	0.182
NJ	53	NJ74	12	28.4	0.368	6.2	5	7	1.9	1.1	1.7	28	67.8	40.5	9.4	9.1	0.412	6	2.4	2.2	0.133
NJ	53	NJ75	11	28.3	0.335	5.5	4.2	6.8	2	1.2	1.6	20	61.7	34.2	10	9.1	0.454	7	2.55	2.46	0.147
NJ	54	NJ76	11	26.1	0.288	5.5	5.2	5.8	2	1.1	1.9	31.6	51.3	36	10.4	10	0.556	8	2.65	2.81	0.18
NJ	54	NJ77	12	30.8	0.429	6.5	4.5	7.5	1.8	1.2	1.6	36.6	49.1	35.4	9.1	9.1	0.394	7	2.32	2.88	0.128
NJ	54	NJ78	13	27.6	0.378	7.7	5	8	1.7	1	1.6	45.5	60	38.7	9.7	10	0.498	8	2.48	2.65	0.161
ST	55	ST1	14	34.8	0.629	8.6	5.2	8.8	1.6	1	1.6	20.7	35.1	36	12	12.3	0.942	7	3.07	3.35	0.322
ST	55	ST2	15	35.4	0.696	9.5	4.1	10.9	1.6	1.1	1.4	21.4	46.4	40	12.2	12.3	0.97	8	3.13	3.37	0.33
ST	55	ST3	14	30.4	0.489	8	7	7	1.8	0.9	2	25.4	47.8	41.5	10.7	10	0.582	8	2.74	2.73	0.198
ST	56	ST4	14	33.9	0.599	8.2	5.6	8.4	1.7	1	1.7	26.1	67.2	38.2	11.6	11.9	0.849	8	2.96	3.26	0.289
ST	56	ST5	14	33.4	0.582	8.6	4.2	9.8	1.6	1.1	1.4	26.8	63.5	39.2	13.2	12.9	1.159	9	3.37	3.52	0.395
ST	56	ST6	14	31.1	0.509	8.8	6	8	1.6	0.9	1.8	26.9	60.3	40.2	10.5	10.6	0.61	10	2.68	2.89	0.208
ST	57	ST7	13	35.5	0.607	7.4	4	9	1.8	1.2	1.4	31.4	53.6	39.6	9.6	9.8	0.473	8	2.45	2.66	0.161
ST	57	ST8	14	32.9	0.567	8.2	4.4	9.6	1.7	1.2	1.5	29.1	64	49.3	12.6	12.8	1.075	7	3.22	3.51	0.366
ST	57	ST9	14	29.9	0.473	8.5	5.9	8.1	1.6	1	1.7	30.6	63.7	40.9	13.3	13.1	1.206	7	3.4	3.59	0.411
ST	58	ST10	15	28.3	0.457	9.6	6	9	1.6	0.9	1.7	28.7	58.6	45.4	10.5	10.3	0.592	7	2.69	2.82	0.202
ST	58	ST11	15	28.4	0.46	9.3	6.2	8.8	1.6	1	1.7	26.2	53.5	29	10.8	10	0.59	8	2.76	2.73	0.201
ST	58	ST12	14	33	0.569	8	6.1	7.9	1.8	1	1.8	27.5	39.5	46.8	10.1	10.4	0.564	9	2.58	2.85	0.192
ST	59	ST13	14	34.5	0.619	8.4	5.2	8.8	1.7	1	1.6	27.8	55	43.5	13	13.2	1.186	8	3.34	3.61	0.404
ST	59	ST14	13	29.1	0.418	7.5	4.5	8.5	1.7	1.1	1.5	27.6	62.7	42.8	13	13.3	1.186	7	3.32	3.63	0.404
ST	59	ST15	15	26.5	0.402	9	6.4	8.6	1.7	1	1.7	28.1	71.7	41.9	13.6	13.3	1.269	8	3.48	3.43	0.432
ST	60	ST16	15	28.5	0.463	9.2	6.8	8.2	1.6	0.9	1.8	39.7	42.1	40	10.9	10.9	0.68	8	2.78	2.99	0.231
ST	60	ST17	14	34.4	0.614	8.5	6.3	7.7	1.6	0.9	1.8	38.1	50.7	37.1	11.5	11.4	0.785	8	2.95	3.11	0.267
ST	60	ST18	13	31	0.47	7	4.9	8.1	1.9	1.2	1.6	32.5	77.9	40.3	11.6	11.1	0.762	8	2.97	3.02	0.259
																	0.581264			2.6588
